# Supplementary material for: Plasma tRNA-derived small RNAs signature as a predictive and prognostic biomarker in lung adenocarcinoma
Source: Cancer Cell Int. 2022 Feb 3;22:59. doi: 10.1186/s12935-022-02481-6 (PMC8812260; doi:10.1186/s12935-022-02481-6)
Supplement: Supplementary file 1 — Additional file 1: Table S1. Clinical pathological data of 37 pairs samples used for verification of three tsRNAs’ expression. [file 12935_2022_2481_MOESM1_ESM.xlsx]

## Sheet: Sheet1
Nubmer	ID	gender	age	grade	T	N	M
E80	1112473	male	65	middle	2	1	0
E1	1110540	male	51	middle	3	1	0
E70	1278115	male	58	high	1b	2	0
E69	1279280	male	36	high	1c	2	0
E76	1140073	female	57	middle	2	0	0
E2	1111315	male	46	middle	1	0	0
E3	1112831	male	59	high	2	0	0
E5	1108321	female	41	middle	2	0	0
E6	1109867	male	69	middle	1	0	0
E7	1154664	female	67	high	2b	0	0
E8	1156316	male	58	middle	2a	2	0
E9	1159168	male	44	middle	2	0	0
E10	1142280	male	60	middle	3b	0	0
E11	1159556	male	56	high	2a	0	0
E12	1158414	male	63	middle	2a	2	0
E13	1155190	male	63	high	2b	0	0
E14	1146103	male	70	low	2b	0	0
E15	1145620	male	50	high	3	2	0
E16	1147191	male	51	middle	2	1	0
E17	1178497	male	71	middle	1	1	0
E18	1194357	male	50	middle	2	1	0
E19	1194820	male	73	low	2	0	0
E20	1194672	male	63	high	1	0	0
E21	1173543	male	60	middle	1	0	0
E22	1179509	female	54	middle	3	1	0
E23	1176123	male	64	middle	3b	0	0
E24	1136905	male	56	middle	2	2	0
E25	1141461	male	54	low	4	2	0
E26	1135857	male	46	middle	2	0	0
E27	1141187	male	64	middle	1	0	0
E28	1140360	male	65	low	4	0	0
E29	1136905	male	56	middle	2	2	0
E30	1140227	male	73	low	3	1	0
E31	1134555	male	60	middle	2	0	0
E32	1123446	male	62	middle	2	0	0
E33	1141461	male	54	low	4	2	0
E34	1135857	male	46	middle	2	0	0
