# Supplementary material for: Plasma tRNA-derived small RNAs signature as a predictive and prognostic biomarker in lung adenocarcinoma
Source: Cancer Cell Int. 2022 Feb 3;22:59. doi: 10.1186/s12935-022-02481-6 (PMC8812260; doi:10.1186/s12935-022-02481-6)
Supplement: Supplementary file 6 — Additional file 6: Table S6. Clinical pathological data used to analyze tRF-21-RKP4P9L0 prognosis [file 12935_2022_2481_MOESM6_ESM.xlsx]

## Sheet: Sheet1
	patient.days_to_death	patient.days_to_last_followup	patient.stage_event.pathologic_stage	patient.stage_event.tnm_categories.pathologic_categories.pathologic_m	patient.stage_event.tnm_categories.pathologic_categories.pathologic_n	patient.stage_event.tnm_categories.pathologic_categories.pathologic_t	patient.vital_status	tRF-21-RK9P4P9L0 counts	group
TCGA-86-8671		18	stage iib	m0	n1	t2b	alive	11	high_group
TCGA-78-7155	1171		stage ib	m0	n0	t2	dead	7	high_group
TCGA-53-7626	929		stage iia	m0	n1	t1	dead	4	low_group
TCGA-75-6203			stage iiia	m0	n2	t2	alive	5	low_group
TCGA-49-4490	385		stage iiia	m0	n2	t3	dead	7	high_group
TCGA-75-7031			stage ib	m0	n0	t2	alive	11	high_group
TCGA-55-7995		5	stage ia	m0	n0	t1b	alive	5	low_group
TCGA-67-3771		610	stage ia	m0	n0	t1	alive	4	low_group
TCGA-44-A47F		246	stage iib	m0	n1	t2b	alive	5	low_group
TCGA-69-7978		70	stage iib	mx	n1	t2b	alive	19	high_group
TCGA-69-7973		230	stage ib	m0	n0	t2a	alive	3	low_group
TCGA-50-5941		285	stage iiia	m0	n2	t2a	alive	5	low_group
TCGA-55-8621		106	stage ia	mx	n0	t1a	alive	7	high_group
TCGA-64-1679		1686	stage iiia	m0	n2	t1	alive	4	low_group
TCGA-05-5428		0	stage iia	m0	n1	t1b	alive	2	low_group
TCGA-55-6985		1233	stage ib	mx	n0	t2	alive	7	high_group
TCGA-55-A4DF		47	stage ia	mx	n0	t1b	alive	3	low_group
TCGA-64-5815		224	stage iib	m0	n1	t2	alive	14	high_group
TCGA-97-A4LX		272	stage ib	m0	n0	t2a	alive	2	low_group
TCGA-O1-A52J	1798		stage ia	mx	n0	t1	dead	2	low_group
TCGA-86-8358		19	stage ib	m0	n0	t2a	alive	14	high_group
TCGA-64-1677	628		stage iiia	m0	n2	t2	dead	7	high_group
TCGA-49-6761		1	stage iiia	mx	n2	t1	alive	12	high_group
TCGA-MP-A4TA	950		stage ia	m0	n0	t1	dead	2	low_group
TCGA-05-4422		365	stage ib	m0	n0	t2	alive	2	low_group
TCGA-86-7711		27	stage iia	m0	n1	t2a	alive	3	low_group
TCGA-62-A46P	594		stage ib	m0	n0	t2	dead	2	low_group
TCGA-44-A4SS		114	stage ia	m0	n0	t1b	alive	3	low_group
TCGA-91-A4BD		218	stage iia	mx	n1	t1b	alive	2	low_group
TCGA-MP-A4T9	1265		stage iiia	mx	n2	t2	dead	2	low_group
TCGA-50-5930	282		stage iiia	m0	n2	t2	dead	4	low_group
TCGA-50-5045	2174			m0	n1	t2	dead	5	low_group
TCGA-99-AA5R		189	stage ia	m0	n0	t1a	alive	4	low_group
TCGA-50-5051		455	stage iiia	m0	n2	t2	alive	9	high_group
TCGA-55-A48X		33	stage iia	m0	n1	t1b	alive	5	low_group
TCGA-86-8074		24	stage iia	m0	n1	t1b	alive	22	high_group
TCGA-L9-A7SV		111	stage iia	m0	n1	t2a	alive	3	low_group
TCGA-NJ-A55O		13	stage iia	m0	n1	t1b	alive	2	low_group
TCGA-75-5147			stage ib	m0	n0	t2	alive	22	high_group
TCGA-62-A471		883	stage iib	m0	n1	t2b	alive	4	low_group
TCGA-55-7284		121	stage iib	mx	n0	t3	alive	4	low_group
TCGA-50-5072		246	stage iiia	m0	n2	t2	alive	4	low_group
TCGA-MP-A4TH		142	stage ia	m0	n0	t1a	alive	2	low_group
TCGA-55-7570		6	stage ia	mx	n0	t1a	alive	2	low_group
TCGA-69-7974		184	stage iiia	mx	n2	t2a	alive	11	high_group
TCGA-55-8616		48	stage ib	m0	n0	t2a	alive	4	low_group
TCGA-86-8674		0	stage iia	m0	n1	t2a	alive	3	low_group
TCGA-95-A4VP		168	stage iiia	m0	n2	t2b	alive	2	low_group
TCGA-55-8508		15	stage iia	mx	n1	t2a	alive	9	high_group
TCGA-55-8205		33	stage iia	m0	n0	t2b	alive	9	high_group
TCGA-55-6981	1379		stage iiia	m0	n2	t1	dead	13	high_group
TCGA-78-7162	3169		stage ia	m0	n0	t1	dead	3	low_group
TCGA-78-8648	1209		stage iib	m0	n0	t3	dead	4	low_group
TCGA-55-8092		26	stage iib	mx	n0	t3	alive	3	low_group
TCGA-86-8668		45	stage ia	m0	n0	t1b	alive	3	low_group
TCGA-86-8055		10	stage iia	m0	n1	t2a	alive	22	high_group
TCGA-50-5936	257		stage iiia	m0	n2	t2	dead	9	high_group
TCGA-55-A48Z		29	stage iiib	mx	n3	t1a	alive	2	low_group
TCGA-44-A479		256	stage ib	mx	n0	t2	alive	4	low_group
TCGA-78-8660	321		stage iib	m0	n1	t2	dead	10	high_group
TCGA-69-7760		154	stage iib	m0	n0	t3	alive	2	low_group
TCGA-78-7150	666		stage iib	m0	n1	t2	dead	2	low_group
TCGA-44-2659		529	stage iib	m0	n1	t1	alive	8	high_group
TCGA-67-3772		573	stage ib	m0	n0	t2	alive	2	low_group
TCGA-75-6214			stage iiia	m0	n2	t2	alive	60	high_group
TCGA-38-4629	864		stage iib	m0	n0	t3	dead	10	high_group
TCGA-78-7145	826		stage iv	m1	n1	t4	dead	5	low_group
TCGA-64-1676		1728	stage ia	m0	n0	t1a	alive	4	low_group
TCGA-75-6205			stage ib	m0	n0	t2a	dead	5	low_group
TCGA-05-4432		761	stage iib	m0	n1	t2	alive	5	low_group
TCGA-J2-A4AG		238	stage ia	mx	n0	t1b	alive	7	high_group
TCGA-75-6206			stage ib	m0	n0	t2	alive	2	low_group
TCGA-86-8673		0	stage ib	m0	n0	t2	alive	9	high_group
TCGA-86-8279		21	stage iia	m0	n1	t2a	alive	2	low_group
TCGA-55-7576		40	stage ib	m0	n0	t2a	alive	2	low_group
TCGA-NJ-A4YF		1720	stage ia	m0	n0	t1	alive	2	low_group
TCGA-55-8085		33	stage ia	m0	n0	t1b	alive	8	high_group
TCGA-05-5715		62	stage ib	m0	n0	t2a	alive	4	low_group
TCGA-91-6848		127	stage iiia	mx	n2	t2	alive	67	high_group
TCGA-93-8067		186	stage ib	mx	n0	t2a	alive	2	low_group
TCGA-78-7159		1221	stage ia	m0	nx	t1	alive	2	low_group
TCGA-55-6980		67	stage ia	m0	n0	t1	alive	20	high_group
TCGA-MP-A4SV	2620		stage ib	m0	n0	t2	dead	11	high_group
TCGA-97-7553		1332	stage ia	mx	n0	t1	alive	5	low_group
TCGA-55-8507		8	stage ia	mx	n0	t1a	alive	5	low_group
TCGA-64-5778		926	stage ib	m0	n0	t2	alive	11	high_group
TCGA-62-A46S	1653		stage ib	m0	n0	t2	dead	2	low_group
TCGA-05-4244		0	stage iv	m1	n2	t2	alive	2	low_group
TCGA-50-5933	2393	2370	stage iiib	m0	n2	t4	dead	4	low_group
TCGA-55-7574		95	stage ib	m0	n0	t2a	alive	4	low_group
TCGA-50-8459		231	stage iib	m0	n0	t3	alive	7	high_group
TCGA-44-8119		99	stage iib	m0	n0	t3	alive	12	high_group
TCGA-05-4396	303		stage iiib	m0	n1	t4	dead	17	high_group
TCGA-67-6217		422	stage iia	m0	n1	t2a	alive	5	low_group
TCGA-69-7979		89	stage ib	mx	n0	t2a	alive	5	low_group
TCGA-05-4249		1158	stage ib	m0	n0	t2	alive	2	low_group
TCGA-62-8402		1445	stage iiia	m0	n2	t2	alive	4	low_group
TCGA-05-4389		1369	stage ia	m0	n0	t1	alive	3	low_group
TCGA-44-6146		302	stage iib	m0	n0	t3	alive	50.3333	high_group
TCGA-49-4494	1081		stage iiia	m0	n2	t3	dead	4	low_group
TCGA-67-6216		141	stage ia	m0	n0	t1a	alive	2	low_group
TCGA-44-6148		96	stage ia	m0	n0	t1b	alive	10	high_group
TCGA-49-AAR2		1945	stage ib	mx	n0	t2	alive	3	low_group
TCGA-35-5375		264	stage iiia	m0	n2	t2	alive	23	high_group
TCGA-NJ-A55R		603	stage ia	mx	n0	t1b	alive	2	low_group
TCGA-55-7914		3	stage iia	mx	n1	t1b	alive	9	high_group
TCGA-44-5643		106	stage iiia	m0	n2	t2b	alive	2	low_group
TCGA-49-6742		1678	stage iia	m0	n1	t2a	alive	3	low_group
TCGA-MN-A4N4		622	stage ia	m0	n0	t1b	alive	3	low_group
TCGA-44-7670		531	stage iia	m0	n1	t1b	alive	2	low_group
TCGA-73-4662		912	stage ia	m0	n0	t1	alive	8	high_group
TCGA-49-4510	896		stage iib	m0	n1	t2	dead	5	low_group
TCGA-55-6987		1170	stage ia	m0	n0	t1	alive	31	high_group
TCGA-MP-A4T6	1790		stage iiia	mx	n2	t1	dead	2	low_group
TCGA-55-8512		3	stage iv	m1b	n1	t1a	alive	2	low_group
TCGA-78-7540		881	stage ib	m0	n0	t2	alive	3	low_group
TCGA-91-6847		842	stage ib	mx	n0	t2	alive	9	high_group
TCGA-05-4405		610	stage ib	m0	n0	t2	alive	3	low_group
TCGA-55-6983		1826	stage iib	m0	n1	t2	alive	16	high_group
TCGA-55-5899		87		m0	n1	t1a	alive	7	high_group
TCGA-69-8254		77				t2b	alive	8	high_group
TCGA-73-4659	711	711	stage iiia	m0	n2	t2	dead	2	low_group
TCGA-78-8655		2360	stage ia	m0	n0	t1	alive	10	high_group
TCGA-05-4250	121		stage iiia	m0	n1	t3	dead	3	low_group
TCGA-69-A59K		214	stage iib	m0	n0	t3	alive	2	low_group
TCGA-75-5125			stage iib	m0	n1	t2	alive	15	high_group
TCGA-38-4625		2973	stage ib	m0	n0	t2a	alive	7	high_group
TCGA-L4-A4E5		213	stage i	m0	n0	t1	alive	3	low_group
TCGA-86-7955		14	stage ib	m0	n0	t2a	alive	4	low_group
TCGA-73-4658	1600	1600	stage ib	m0	n0	t2	dead	4	low_group
TCGA-05-5420		31	stage iiia	m0	n2	t2	alive	5	low_group
TCGA-78-7148	626		stage iib	m0	n1	t2	dead	2	low_group
TCGA-55-7815		54	stage ib	mx	n0	t2a	alive	3	low_group
TCGA-64-5779		507	stage iiia	m0	n2	t2	alive	11	high_group
TCGA-MN-A4N1		285	stage iia	m0	n1	t2a	alive	2	low_group
TCGA-62-8399		2093	stage iiia	m0	n2	t2	alive	4	low_group
TCGA-J2-A4AE		282	stage ia	mx	n0	t1a	alive	2	low_group
TCGA-55-8615		15	stage iiia	mx	n2	t3	alive	4	low_group
TCGA-55-7994		31	stage iib	mx	n0	t3	alive	10	high_group
TCGA-44-7667		557	stage iib	mx	n0	t3	alive	4	low_group
TCGA-62-A46U		1708	stage iib	m0	n1	t2	alive	3	low_group
TCGA-49-4505	428		stage iib	m0	n1	t2	dead	2	low_group
TCGA-55-7728		24	stage ib	mx	n0	t2a	alive	7	high_group
TCGA-99-8033		170	stage iv	m1	nx	tx	alive	7	high_group
TCGA-75-5122			stage ib	m0	n0	t2	dead	10	high_group
TCGA-49-4506	999		stage iib	m0	n1	t2	dead	2	low_group
TCGA-86-A4P7		14	stage ib	m0	n0	t2a	alive	2	low_group
TCGA-05-5423		151	stage iib	m0	n1	t2	alive	3	low_group
TCGA-05-4417		455	stage ib	m0	n0	t2	alive	2	low_group
TCGA-55-8090		6	stage ia	m0	n0	t1a	alive	2	low_group
TCGA-05-4410		0	stage ib	m0	n0	t2	alive	8	high_group
TCGA-55-8511		9	stage ib	mx	n0	t2a	alive	5	low_group
TCGA-44-7661		153	stage ib	m0	n0	t2a	alive	3	low_group
TCGA-67-3770		610	stage ia	m0	n0	t1	alive	5	low_group
TCGA-05-4402	244		stage iv	m1	nx	t2	dead	5	low_group
TCGA-53-7813		418	stage iiib	m0	n0	t4	alive	10	high_group
TCGA-55-7907		16	stage iia	mx	n1	t2a	alive	4	low_group
TCGA-55-7913		62	stage ia	mx	n0	t1b	alive	3	low_group
TCGA-78-7154	593		stage iiia	m0	n2	t3	dead	5	low_group
TCGA-86-8280		16	stage iia	m0	n0	t2b	alive	3	low_group
TCGA-55-8506		11	stage iib	mx	n0	t3	alive	5	low_group
TCGA-38-4628	1492		stage iib	m0	n1	t2	dead	3	low_group
TCGA-38-4627	1147		stage iia	m0	n1	t1b	dead	11	high_group
TCGA-55-8614		41	stage ib	mx	n0	t2a	alive	12	high_group
TCGA-05-4403		578	stage ib	m0	n0	t2	alive	2	low_group
TCGA-78-7161		215	stage iib	m0	n0	t3	alive	3	low_group
TCGA-86-7701		11	stage iv	m1	n0	t2	alive	5	low_group
TCGA-97-8176		252	stage iiia	m0	n1	t3	alive	8	high_group
TCGA-75-5126			stage iiia	m0	n2	t3	alive	21	high_group
TCGA-44-2657		400	stage ib	m0	nx	t2	alive	4	low_group
TCGA-86-7954		0	stage ib	m0	n0	t2	alive	8	high_group
TCGA-55-7725		39	stage ia	mx	n0	t1a	alive	3	low_group
TCGA-50-5939	460		stage ib	m0	n0	t2	dead	2	low_group
TCGA-95-7039		34	stage iib	mx	n0	t3	alive	8	high_group
TCGA-55-8208		0	stage ia	m0	n0	t1b	alive	11	high_group
TCGA-49-AAR9	260		stage iib	mx	n0	t3	dead	2	low_group
TCGA-MP-A4TF	336		stage iia	m0	n0	t2b	dead	3	low_group
TCGA-69-7763		690	stage ia	m0	n0	t1b	alive	5	low_group
TCGA-95-8039		27	stage ia	mx	n0	t1	alive	14	high_group
TCGA-78-7220	807		stage iiia	m0	n2	t2	dead	20	high_group
TCGA-05-5425		90	stage iib	m0	n1	t2b	alive	20	high_group
TCGA-50-5044	624		stage iiib	m0	n1	t4	dead	2	low_group
TCGA-64-5781		1202	stage ib	m0	n0	t2	alive	3	low_group
TCGA-55-8302		23	stage ib	mx	n0	t2	alive	5	low_group
TCGA-78-7167	2681		stage iv	m1	n0	t2	dead	3	low_group
TCGA-95-A4VN		142	stage iia	m0	n1	t2a	alive	3	low_group
TCGA-97-7546		964	stage ia	mx	n0	t1	alive	7	high_group
TCGA-97-8547		148	stage iiia	mx	n2	t2a	alive	7	high_group
TCGA-75-6212			stage iib	m0	n1	t2	alive	3	low_group
TCGA-86-8075		43	stage ib	m0	n0	t2	alive	11	high_group
TCGA-44-3918		197	stage ia	m0	n0	t1	alive	2	low_group
TCGA-49-AARR		4630	stage ia	mx	n0	t1	alive	4	low_group
TCGA-55-6978	176		stage iia	mx	n0	t2b	dead	29	high_group
TCGA-38-4631	354		stage ib	m0	n0	t2	dead	9	high_group
TCGA-91-7771		31	stage iib	mx	n0	t3	alive	7	high_group
TCGA-95-7567		163	stage iib	m0	n1	t2b	alive	3	low_group
TCGA-49-4501	1421		stage ib	m0	n0	t2	dead	2	low_group
TCGA-50-5946		349	stage ia	mx	n0	t1	alive	19	high_group
TCGA-49-AARE	1229		stage ia	mx	n0	t1	dead	3	low_group
TCGA-05-4384		426	stage iiia	m0	n2	t2	alive	4	low_group
TCGA-49-4487	855		stage ia	m0	n0	t1	dead	2	low_group
TCGA-78-7537	1622		stage ib	m0	n0	t2	dead	3	low_group
TCGA-J2-8192		154	stage iia	mx	n1	t2a	alive	17	high_group
TCGA-95-8494		71	stage iia	m0	n1	t2a	alive	21	high_group
TCGA-50-6591	119		stage iv	m1	n0	t2	dead	7	high_group
TCGA-55-8089		100	stage ia	m0	n0	t1a	alive	13	high_group
TCGA-44-3398		253	stage ia	m0	n0	t1b	alive	3	low_group
TCGA-44-2655		575	stage ia	m0	n0	t1	alive	5	low_group
TCGA-78-7143	4961		stage ib	m0	n0	t2	dead	2	low_group
TCGA-55-6984	760		stage iib	m0	n1	t2	dead	18	high_group
TCGA-55-6982	995		stage iib	m0	n1	t2	dead	17	high_group
TCGA-75-6207			stage iiia	m0	n2	t2	dead	4	low_group
TCGA-J2-A4AD		287	stage ia	mx	n0	t1a	alive	5	low_group
TCGA-86-A4JF		0	stage iib	m0	n0	t3	alive	3	low_group
TCGA-55-1592	701		stage ia	m0	n0	t2	dead	3	low_group
TCGA-38-4632	1357		stage iv	m1	n1	t2	dead	2	low_group
TCGA-91-6840		0	stage ia	m0	n0	t1b	alive	13	high_group
TCGA-93-7347		297	stage ia	mx	n0	t1a	alive	10	high_group
TCGA-44-6145		103	stage ia	m0	n0	t1	alive	31	high_group
TCGA-75-7030			stage iib	m0	n0	t3	alive	9	high_group
TCGA-50-5068	1499	1499	stage iib	mx	n1	t2	dead	5	low_group
TCGA-44-7671		535	stage ib	m0	n0	t2a	alive	2	low_group
TCGA-91-A4BC		44	stage iia	mx	n0	t2b	alive	3	low_group
TCGA-91-6849		35	stage iiia	mx	n2	t2	alive	8	high_group
TCGA-99-8025		427	stage iiia	m0	n2	t3	alive	5	low_group
TCGA-05-4424		913	stage iib	m0	n0	t3	alive	5	low_group
TCGA-44-7660		162	stage ib	mx	n0	t2	alive	3	low_group
TCGA-05-4382		607	stage ib	m0	n0	t2	alive	3	low_group
TCGA-55-6972		1475	stage ib	m0	n0	t2	alive	12	high_group
TCGA-53-A4EZ		280	stage iia	mx	n1	t2a	alive	3	low_group
TCGA-55-6543		2	stage ia	mx	n0	t1b	alive	5	low_group
TCGA-73-7499		519	stage ib	m0	n0	t2a	alive	10	high_group
TCGA-62-8398	444		stage iiia	m0	n2	t2	dead	16	high_group
TCGA-55-7281		18	stage ia	m0	n0	t1b	alive	5	low_group
TCGA-73-7498		621	stage ia	m0	n0	t1b	alive	7	high_group
TCGA-97-8172		182	stage ib	m0	n0	t2a	alive	3	low_group
TCGA-44-6779	500		stage iib	mx	n1	t2	dead	5	low_group
TCGA-53-7624	1043		stage iv	m1	n0	t2	dead	7	high_group
TCGA-97-A4M1		209	stage ia	m0	n0	t1a	alive	2	low_group
TCGA-05-4433		730	stage ib	m0	n0	t2	alive	12	high_group
TCGA-55-A490		48	stage iia	mx	n0	t2b	alive	2	low_group
TCGA-05-4426		791	stage ib	m0	n0	t2	alive	3	low_group
TCGA-50-6597		1015	stage ib	m0	n0	t2	alive	4	low_group
TCGA-69-7765		129		mx	n0	t4	alive	21	high_group
TCGA-55-8087		21	stage ib	mx	n0	t2a	alive	8	high_group
TCGA-50-6595	189		stage iiia	m0	n2	t2	dead	9	high_group
TCGA-78-8640		6346	stage iia	m0	n1	t1	alive	7	high_group
TCGA-62-8394	139		stage iiib	m0	n2	t4	dead	11	high_group
TCGA-44-6147		236	stage ia	m0	nx	t1b	alive	17.3333	high_group
TCGA-50-5066		297	stage ib	m0	n0	t2	alive	6.5	high_group
TCGA-95-7947		40	stage ia	m0	n0	t1a	alive	5	low_group
TCGA-78-7536	244		stage iiia	m0	n2	t2	dead	12	high_group
TCGA-55-8206		46	stage ia	m0	n0	t1b	alive	2	low_group
TCGA-78-7542	321		stage ib	m0	n0	t2	dead	3	low_group
TCGA-50-5935	653	653	stage ia	m0	n0	t1	dead	5	low_group
TCGA-86-8359		26	stage iiia	m0	n2	t3	alive	10	high_group
TCGA-97-8179		15	stage ia	m0	n0	t1a	alive	10	high_group
TCGA-55-8204		0	stage ib	mx	n0	t2a	alive	11	high_group
TCGA-44-5644		498	stage ib		n0	t2a	alive	4	low_group
TCGA-49-6743		369	stage iiia	mx	n2	t1	alive	8	high_group
TCGA-44-A4SU		76	stage ia	mx	n0	t1a	alive	5	low_group
TCGA-L9-A743		312	stage iia	m0	n1	t2a	alive	2	low_group
TCGA-95-7948		133	stage ib	m0	n0	t2a	alive	16	high_group
TCGA-55-1595		1479	stage ia	m0	n0	t1	alive	4	low_group
TCGA-55-7911		21	stage ia	mx	n0	t1a	alive	8	high_group
TCGA-50-6590	1288		stage ib	m0	n0	t2	dead	12	high_group
TCGA-80-5608			stage ia	m0	n0	t1	alive	22	high_group
TCGA-55-8513		146	stage iib	mx	n0	t3	alive	2	low_group
TCGA-44-7662		50	stage ib	mx	n0	t2a	alive	11	high_group
TCGA-78-7146	173		stage iiia	m0	n2	t2	dead	4	low_group
TCGA-91-6831		39	stage ib	mx	n0	t2	alive	5	low_group
TCGA-78-7163		6812	stage ib	m0	n0	t2	alive	2	low_group
TCGA-49-AAQV	677		stage ii	mx	n1	t1	dead	3	low_group
TCGA-93-A4JP		269	stage iv	m1b	nx	tx	alive	5	low_group
TCGA-44-6778		1110	stage ia	mx	n0	t1	alive	2	low_group
TCGA-86-8056		0	stage iiia	m0	n0	t4	alive	10	high_group
TCGA-55-A493		28	stage ib	m0	n0	t2a	alive	2	low_group
TCGA-86-A4P8		39	stage iiia	mx	n2	t1b	alive	2	low_group
TCGA-55-8620		66	stage iv	m1b	n1	t1a	alive	4	low_group
TCGA-05-5429		30	stage iiia	m0	n2	t3	alive	4	low_group
TCGA-86-8672		15	stage iib	m0	n0	t3	alive	20	high_group
TCGA-49-AAR3		1893	stage iib	mx	n1	t2	alive	3	low_group
TCGA-86-7953		34	stage ia	m0	n0	t1b	alive	10	high_group
TCGA-44-A47B		105	stage ib	m0	n0	t2a	alive	4	low_group
TCGA-MP-A4TI	429		stage iia	m0	n1	t2a	dead	2	low_group
TCGA-69-7980		43	stage i	m0	n0	t1b	alive	11	high_group
TCGA-75-7025			stage ib	m0	n0	t2	alive	51	high_group
TCGA-44-6775		83	stage ib	mx	n0	t2a	alive	13.6667	high_group
TCGA-05-4425		669	stage iv	m1	n0	t2	alive	2	low_group
TCGA-73-4675		40	stage iiia	m0	n1	t3	alive	5	low_group
TCGA-MP-A4T2	1136		stage ia	m0	n0	t1	dead	5	low_group
TCGA-67-6215		162	stage ib	m0	n0	t2a	alive	3	low_group
TCGA-49-4512	905	157	stage iiia	mx	n2	t2	dead	7	high_group
TCGA-73-4676		122	stage iia	m0	n1	t2a	alive	10	high_group
TCGA-97-A4M2		197	stage ia	m0	n0	t1a	alive	3	low_group
TCGA-50-5055		785	stage iia	m0	n1	t1	alive	10	high_group
TCGA-MP-A4TK	582		stage iib	mx	n1	t2	dead	2	low_group
TCGA-80-5611			stage ib	m0	n0	t2	alive	4	low_group
TCGA-69-8255		129	stage ia	m0	n0	t1a	alive	19	high_group
TCGA-91-6836		11	stage ib	mx	n0	t2	alive	9	high_group
TCGA-55-1596		1375	stage iib	m0	n1	t2	alive	5	low_group
TCGA-44-2662		480	stage ib	m0	n0	t2	alive	7	high_group
TCGA-91-6828		38	stage ia	m0	n0	t1a	alive	5	low_group
TCGA-91-8497		174	stage ia	mx	n0	t1a	alive	5	low_group
TCGA-95-7043		2	stage ia	mx	n0	t1a	alive	54	high_group
TCGA-44-6144		9	stage ia	m0	n0	t1a	alive	4	low_group
TCGA-55-6968	1293		stage iv	m1	n0	t1	dead	10	high_group
TCGA-75-7027			stage ib	m0	n0	t2	alive	4	low_group
TCGA-55-8514		202	stage ib	mx	n0	t2a	alive	2	low_group
TCGA-L9-A444		6	stage ia	mx	n0	t1a	alive	2	low_group
TCGA-55-8301		44	stage ib	mx	n0	t2a	alive	5	low_group
TCGA-62-8395		705	stage iib	m0	n0	t3	alive	5	low_group
TCGA-97-8171		107	stage iv	m1a	n2	t2a	alive	5	low_group
TCGA-55-8510		228	stage ib	mx	n0	t2a	alive	9	high_group
TCGA-73-A9RS		305	stage iib	m0	n0	t3	alive	4	low_group
TCGA-44-6774		166	stage iiia	m0	n2	t1	alive	7	high_group
TCGA-64-1678		1189		m0	n0	t2b	alive	2	low_group
TCGA-55-8096		47	stage ib	mx	n0	t2a	alive	7	high_group
TCGA-55-6970	464		stage iiia	mx	n2	t2	dead	7	high_group
TCGA-93-A4JQ		100	stage ia	mx	n0	t1b	alive	2	low_group
TCGA-55-8299		216	stage ia	mx	n0	t1b	alive	4	low_group
TCGA-44-8117		259	stage ib	m0	n0	t2a	alive	4	low_group
TCGA-49-AAR0		4415	stage ia	mx	n0	t1	alive	2	low_group
TCGA-55-8203		4	stage ia	m0	n0	t1b	alive	4	low_group
TCGA-64-5774		2550	stage ib	m0	n0	t2	alive	3	low_group
TCGA-86-8076		26	stage ia	m0	n0	t1	alive	15	high_group
TCGA-97-8175		87	stage ib	m0	n0	t2a	alive	5	low_group
TCGA-55-6642		993	stage ib	mx	n0	t2	alive	2	low_group
TCGA-05-4398		1431	stage iiib	m0	n3	t4	alive	2	low_group
TCGA-55-6986		2151	stage ib	m0	n0	t2	alive	17	high_group
TCGA-55-7726		39	stage ia	mx	n0	t1b	alive	3	low_group
TCGA-55-6971		25	stage ib	mx	n0	t2	alive	22	high_group
TCGA-91-8496		197	stage ib	mx	nx	t2a	alive	4	low_group
TCGA-50-5931	434	267	stage ib	m0	n0	t2	dead	4	low_group
TCGA-62-8397		940	stage iib	m0	n0	t3	alive	7	high_group
TCGA-49-6767		0	stage iib	mx	n0	t3	alive	26	high_group
TCGA-55-7724		0	stage ib	mx	n0	t2a	alive	8	high_group
TCGA-86-8073		13	stage ib	m0	n0	t2a	alive	23	high_group
TCGA-86-A4D0		30	stage iia	m0	n0	t2b	alive	7	high_group
TCGA-91-6830		1	stage iia	mx	n1	t1	alive	20	high_group
TCGA-78-8662	3361		stage ib	m0	n0	t2	dead	9	high_group
TCGA-50-6592	777		stage ib	m0	n0	t2	dead	3	low_group
TCGA-86-8585		35	stage ib	m0	n0	t2a	alive	7	high_group
TCGA-50-5049		1485	stage ia	m0	n0	t2	alive	7	high_group
TCGA-99-8032		44	stage ia	m0	n0	t1a	alive	3	low_group
TCGA-97-7941		22	stage ia	mx	n0	t1b	alive	8	high_group
TCGA-95-7562	87		stage iia	m0	n1	t2a	dead	16	high_group
TCGA-05-4390		1126	stage ib	m0	n0	t2	alive	4	low_group
TCGA-05-4397	731		stage iib	m0	n1	t2	dead	2	low_group
TCGA-49-6744		890	stage iia	mx	n1	t2a	alive	3	low_group
TCGA-55-6969		1239	stage ib	m0	n0	t2	alive	20	high_group
TCGA-44-2668		246	stage ib	m0	n0	t2	alive	2	low_group
TCGA-97-A4M6		185	stage ia	m0	n0	t1a	alive	2	low_group
TCGA-55-A48Y		42	stage iia	m0	n0	t2b	alive	3	low_group
TCGA-86-8278		23	stage iib	m0	n1	t2	alive	5	low_group
TCGA-50-6673	22		stage i	m0	n0	t1	dead	7	high_group
TCGA-86-6851		0	stage iia	m0	n1	t1b	alive	24	high_group
TCGA-78-7152		1202	stage ib	m0	n0	t2	alive	2	low_group
TCGA-44-5645		208	stage ia		nx	t1	alive	7	high_group
TCGA-38-4626		2595		m0	n0	t2b	alive	2	low_group
TCGA-44-7669	574		stage iia	mx	n1	t1b	dead	3	low_group
